# Supplementary material for: Development and Optimization of Alpha-Pinene-Loaded Solid Lipid Nanoparticles (SLN) Using Experimental Factorial Design and Dispersion Analysis
Source: PubMed Central journal article supplement (PMC6696006; doi:10.3390/molecules24152683), 2019-07-24
Supplement: molecules-24-02683-s001.pdf [file molecules-24-02683-s001.pdf]

## Supplementary Material

**Table S1.** Analysis of A) the mean particle size (Z-Ave), B) the polydispersity index (PDI) and C) zeta potential (ZP) by ANOVA statistical test.

A)

| Evaluated factors and their interactions | Sum of squares | Degrees of freedom | Mean square | F-value  | p-value  |
|------------------------------------------|----------------|--------------------|-------------|----------|----------|
| (1)Imwitor® 900 K                        | 1984717        | 1                  | 1984717     | 6.173713 | 0.088900 |
| (2)Poloxamer 188                         | 2062096        | 1                  | 2062096     | 6.414409 | 0.085225 |
| 1 by 2                                   | 1909648        | 1                  | 1909648     | 5.940199 | 0.092727 |
| Error                                    | 964436         | 3                  | 321479      |          |          |
| Total                                    | 6920897        | 6                  |             |          |          |

ANOVA; Var.: Z-Average; R-sqr=.86065; Adj:.7213 (FD\_Alpha-pinene (1).sta) 2\*\*(2-0) design; MS Residual=321478.7 DV: Z-Average.

B)

| Evaluated factors and their interactions | Sum of squares | Degrees of freedom | Mean square | F-value  | p-value  |
|------------------------------------------|----------------|--------------------|-------------|----------|----------|
| (1)Imwitor® 900 K                        | 0.063504       | 1                  | 0.063504    | 2.779458 | 0.194071 |
| (2)Poloxamer188                          | 0.066049       | 1                  | 0.066049    | 2.890848 | 0.187643 |
| 1 by 2                                   | 0.034225       | 1                  | 0.034225    | 1.497968 | 0.308339 |
| Error                                    | 0.068543       | 3                  | 0.022848    |          |          |
| Total                                    | 0.232321       | 6                  |             |          |          |

ANOVA; Var.:PDI; R-sqr=.70496; Adj:.40993 (FD\_Alpha-pinene (1).sta) 2\*\*(2-0) design; MS Residual=.0228476 DV: PDI

C)

| Evaluated factors and their interactions | Sum of squares | Degrees of freedom | Mean square | F-value  | p-value  |
|------------------------------------------|----------------|--------------------|-------------|----------|----------|
| (1)Imwitor® 900 K                        | 0.000784       | 1                  | 0.000784    | 0.078011 | 0.798159 |
| (2)Poloxamer 188                         | 0.005329       | 1                  | 0.005329    | 0.530259 | 0.519189 |
| 1 by 2                                   | 0.001369       | 1                  | 0.001369    | 0.136221 | 0.736577 |
| Error                                    | 0.030149       | 3                  | 0.01005     |          |          |
| Total                                    | 0.037631       | 6                  |             |          |          |

ANOVA; Var.:ZetaPotential; R-sqr=.19882; Adj:0. (FD\_Alpha-pinene (1).sta) 2\*\*(2-0) design; MS Residual=.0100498 DV: Zeta Potential

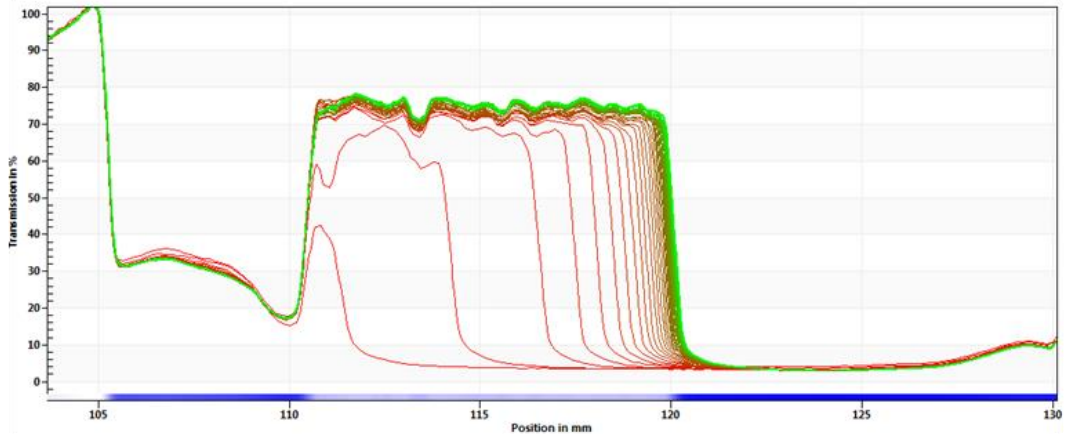

A) SLN1, 25°C - No observable separation.

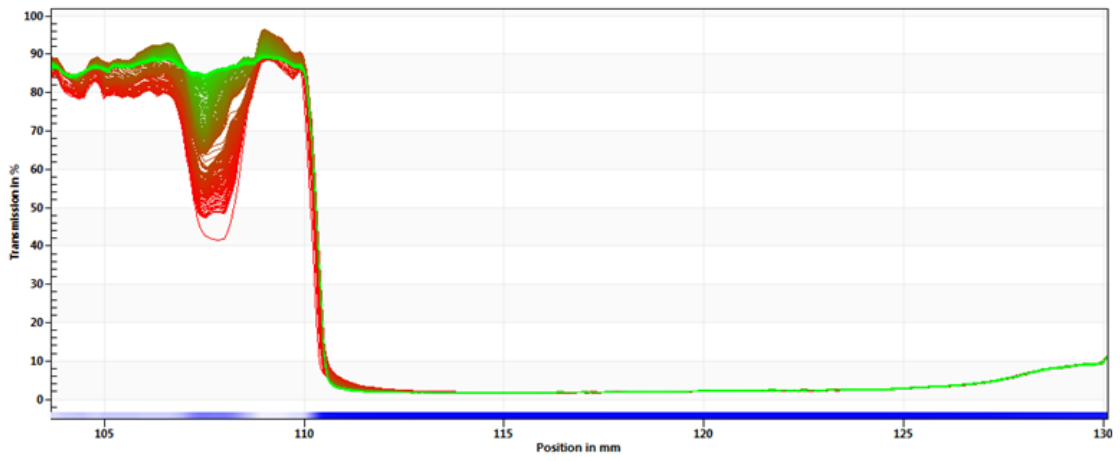

B) SLN2, 25°C - No observable separation. Differences occur before the meniscus.

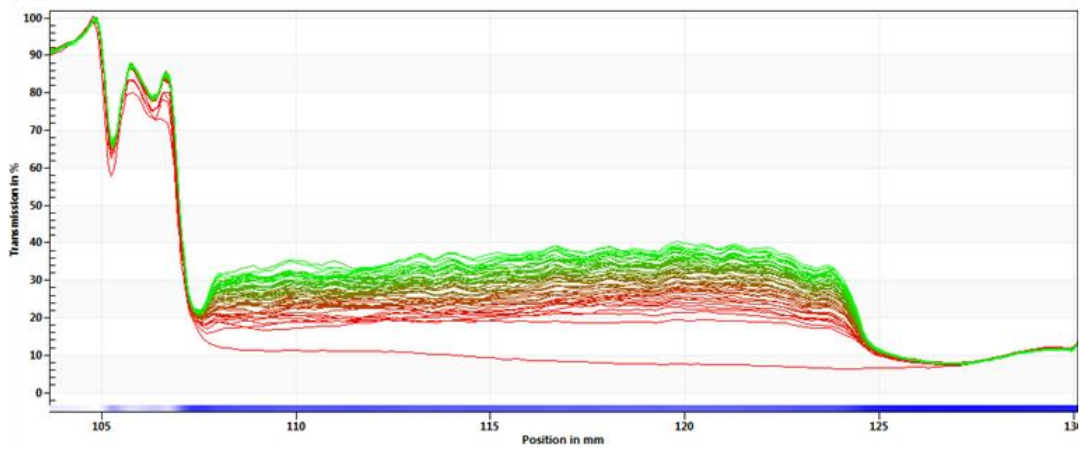

C) SLN3, 25°C - Separation process: sedimentation.

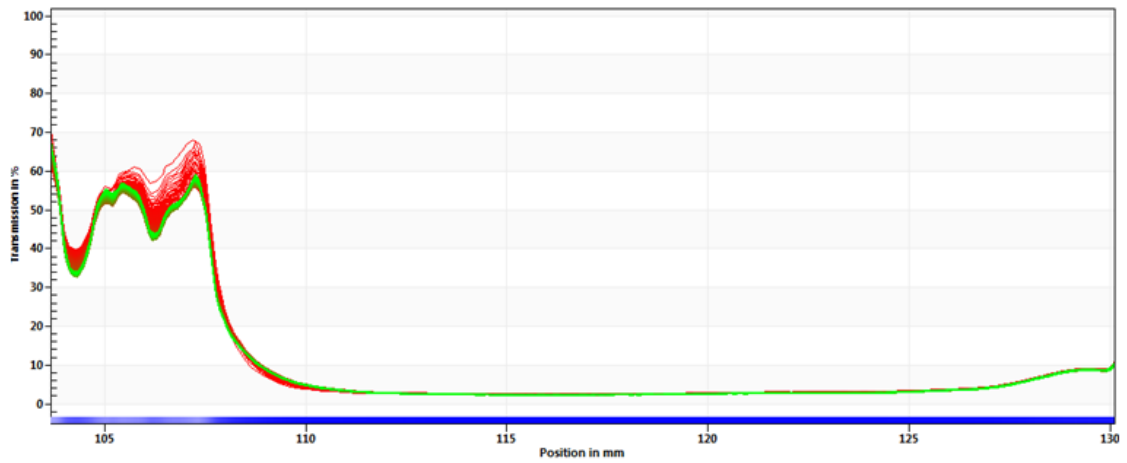

D) SLN4, 25°C - No observable separation.

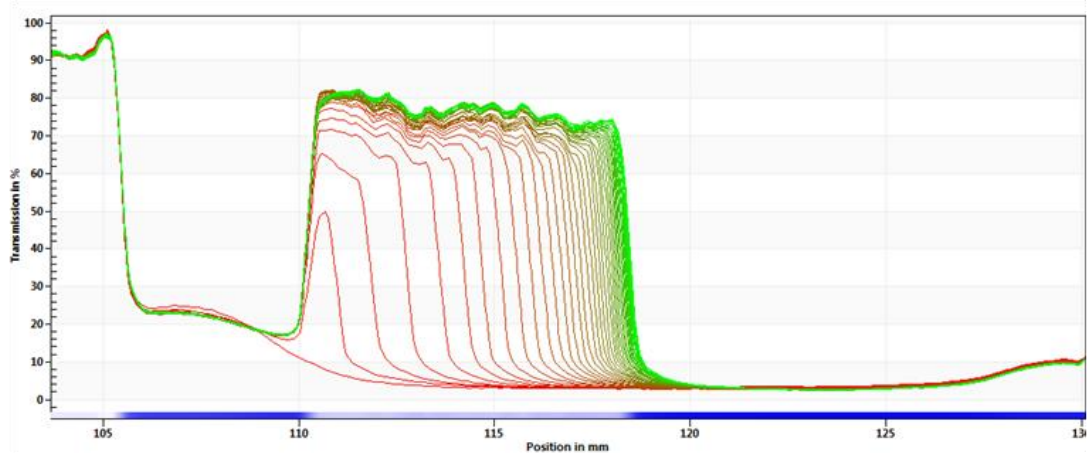

E) SLN6, 25°C - Separation process: sedimentation with particle compaction.

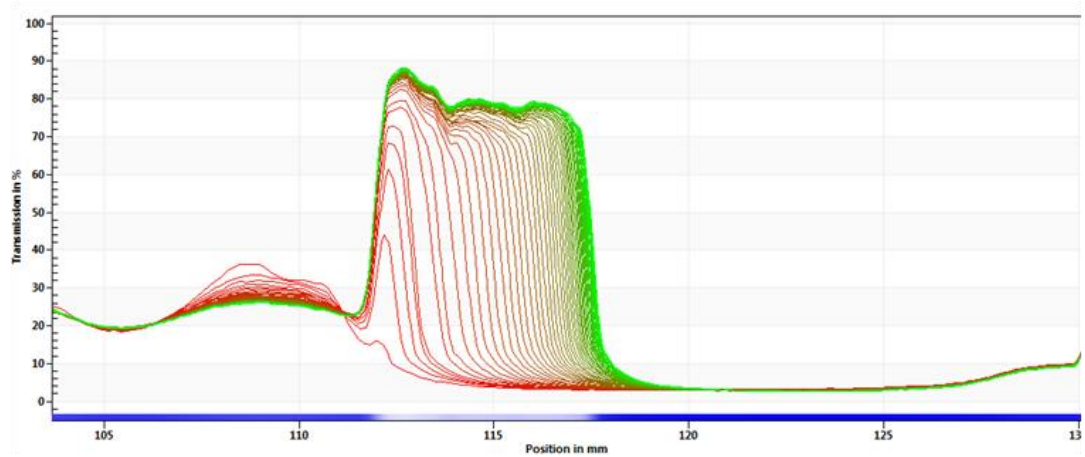

F) SLN7 25°C - Separation process: sedimentation with particle compaction.

**Figure S1:** A) SLN1, 25°C - Separation process: sedimentation with particle compaction; B) SLN2, 25°C - No observable separation. Differences occur before the meniscus; C) SLN3, 25°C - Separation process: sedimentation.; D) SLN4, 25°C - No observable separation; E) SLN6, 25°C - Separation process:

sedimentation with particle [compaction](#); F) SLN7, 25°C - Separation process: sedimentation with particle [compaction](#).
